# Supplementary material for: Detection of Staphylococcus aureus using acridine orange-doped silica nanoparticles as a fluorescent label
Source: Royal Society of Chemistry journal article supplement (doi:10.1039/c5ra05599g), 2015-01-01
Supplement: c5ra05599g1.pdf [file c5ra05599g1.pdf]

Electronic Supplementary Material (ESI) for RSC Advances.  
This journal is © The Royal Society of Chemistry 2015

### Supplementary Information

#### Detection of *Staphylococcus aureus* using acridine orange-doped silica nanoparticles as a fluorescent label

Yan Jiang<sup>abc</sup>, Yi Xu<sup>abc\*</sup>, Renjie Wang<sup>abc</sup>, Bin Zhao<sup>abc</sup>, XiaoDan Zhang<sup>abc</sup>, and Huazhou Zhao<sup>abc</sup>

<sup>a</sup>School of Chemistry and Chemical Engineering, Chongqing University, No. 174, St. Shazheng, Shapingba District, Chongqing, 400044, China.;

<sup>b</sup>Key Disciplines Lab of Novel Micro-nano Devices and System Technology, Chongqing University, Shapingba, Chongqing 400044, China

<sup>c</sup>International R & D center of Micro-nano Systems and New Materials Technology, Chongqing University, Shapingba, Chongqing 400044, China

**Table 1S.** Zeta potential data of AO@SiO<sub>2</sub> and NH<sub>2</sub>-AO@SiO<sub>2</sub>

| Sample                               | Potential Distribution                                                              | Zeta Potential (mV) |
|--------------------------------------|-------------------------------------------------------------------------------------|---------------------|
| AO@SiO <sub>2</sub>                  | 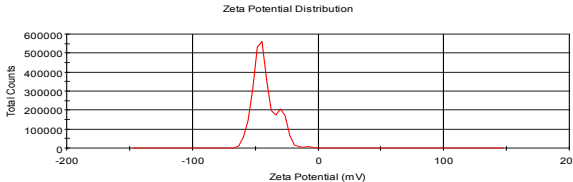  | -42.5±3.16          |
| NH <sub>2</sub> -AO@SiO <sub>2</sub> |  | 1.68±1.24           |

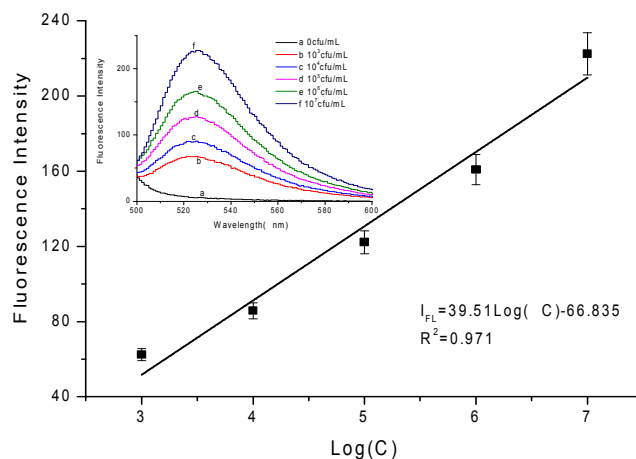

**Figure 1S.** Standard curve of AO@SiO<sub>2</sub>-NH<sub>2</sub> labeled *S.aureus* in spiked milk samples. ( $\lambda_{Ex}$ =480nm)
